# Supplementary material
Source: PubMed Central journal article supplement (PMC5640814)
Supplement: MCB.00142-17_zmb021171630s1.pdf [file MCB.00142-17_zmb021171630s1.pdf]

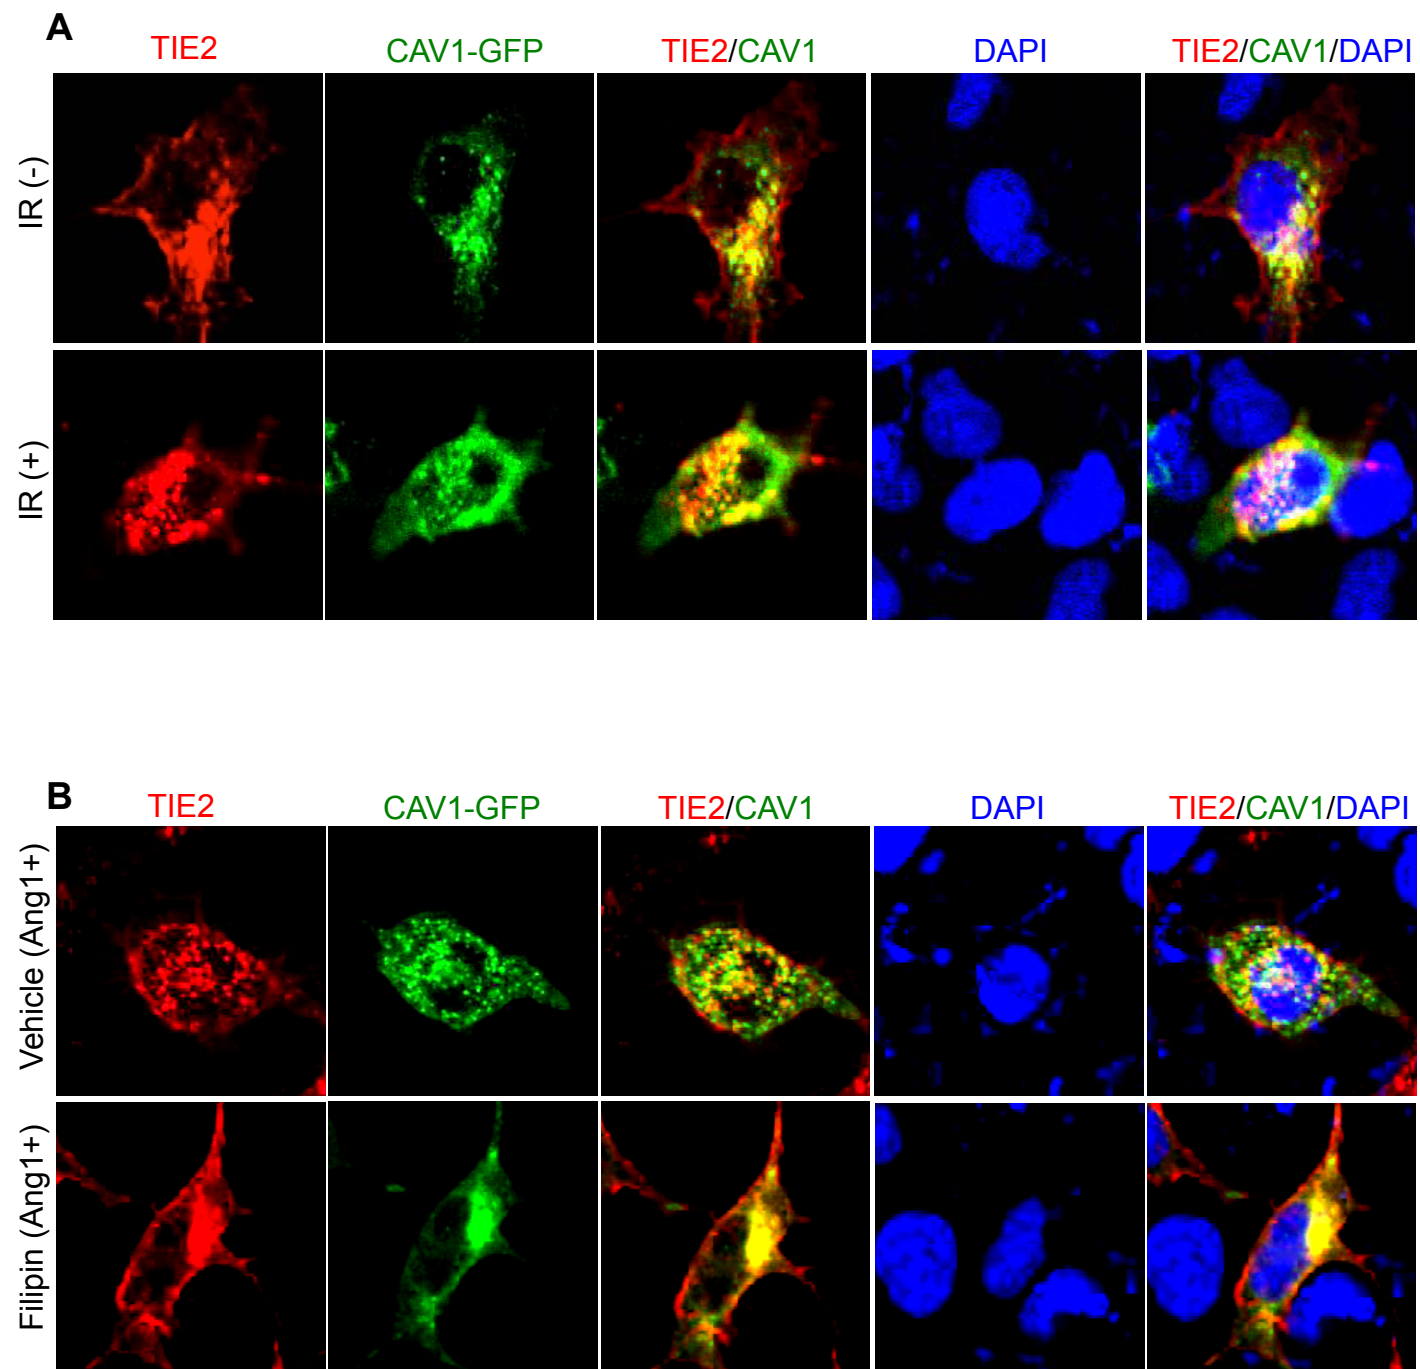

**Supplemental Figure S1.** Additional data on caveolin-1-dependent TIE2 nuclear translocation using confocal microscopy .

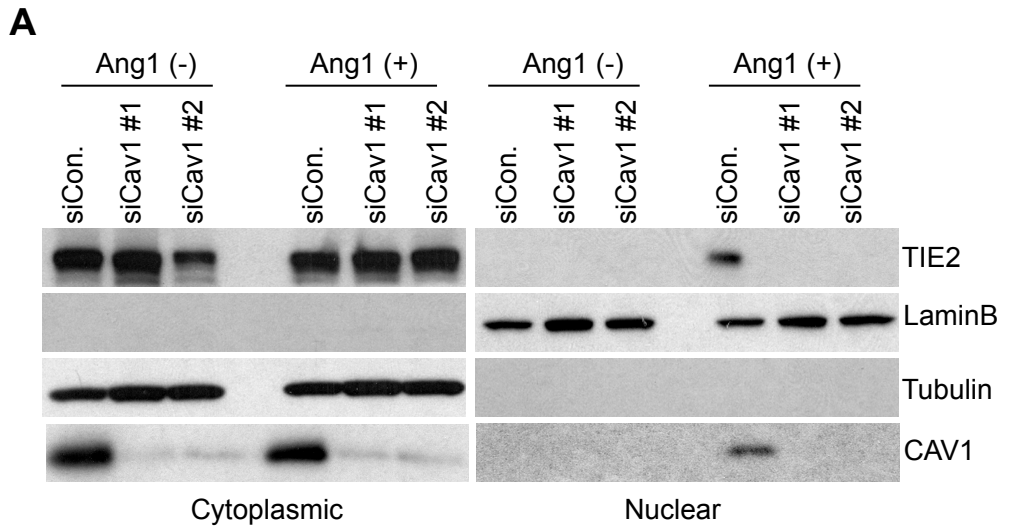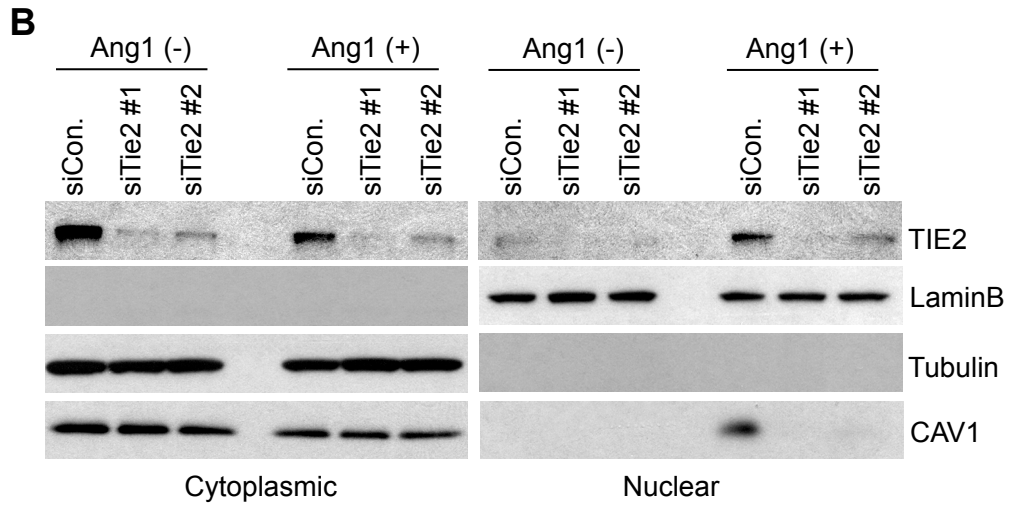

**Supplemental Figure S2.** Additional data on caveolin-1-dependent TIE2 nuclear translocation.

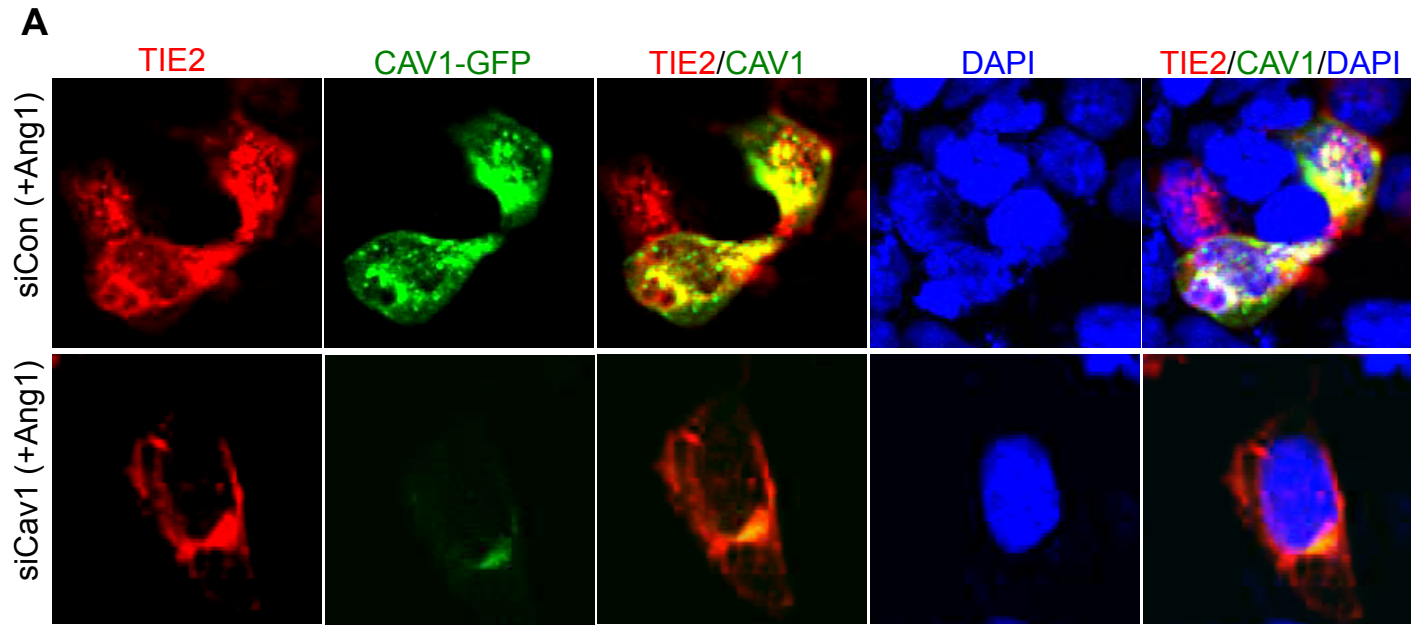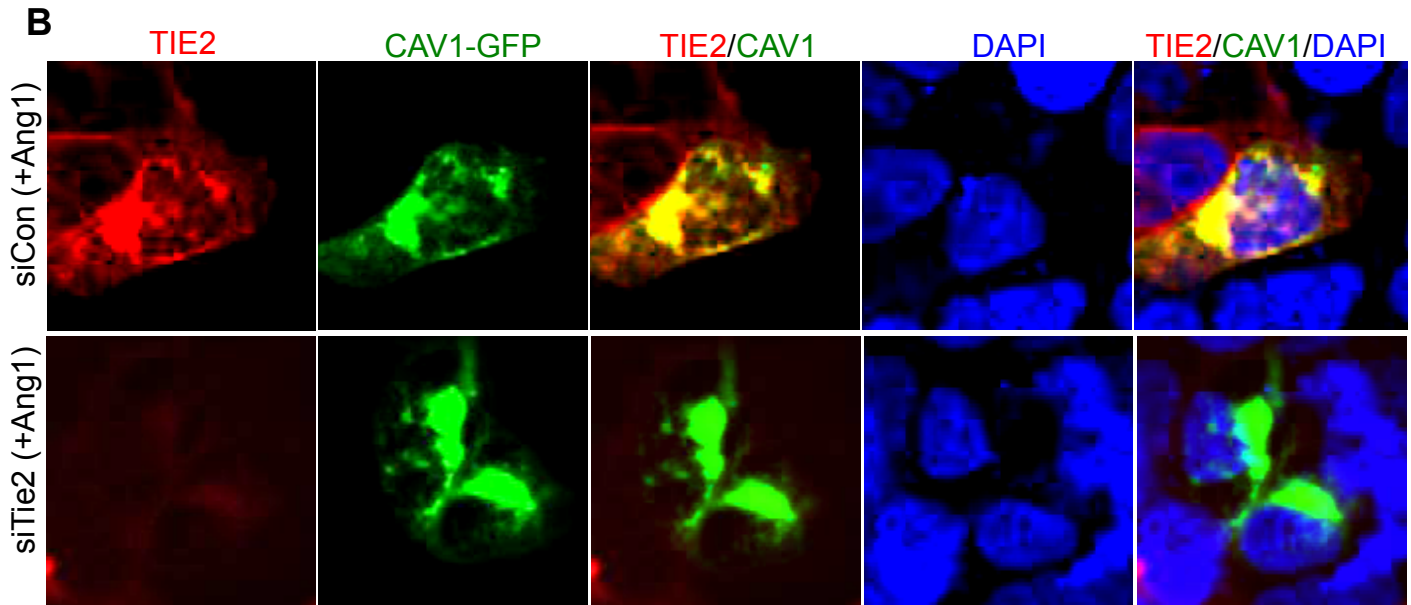

**Supplemental Figure S3.** Additional data on caveolin-1-dependent TIE2 nuclear translocation using confocal microscope.

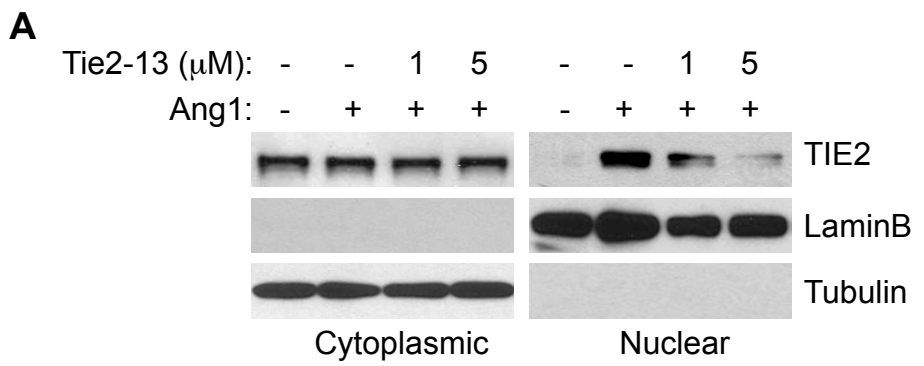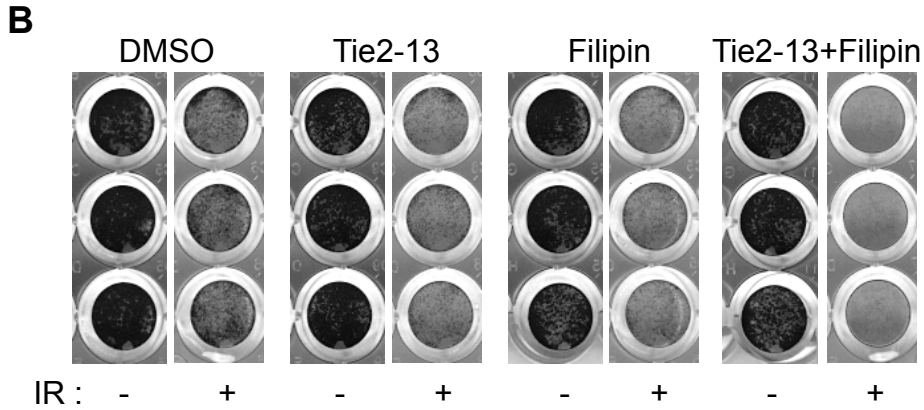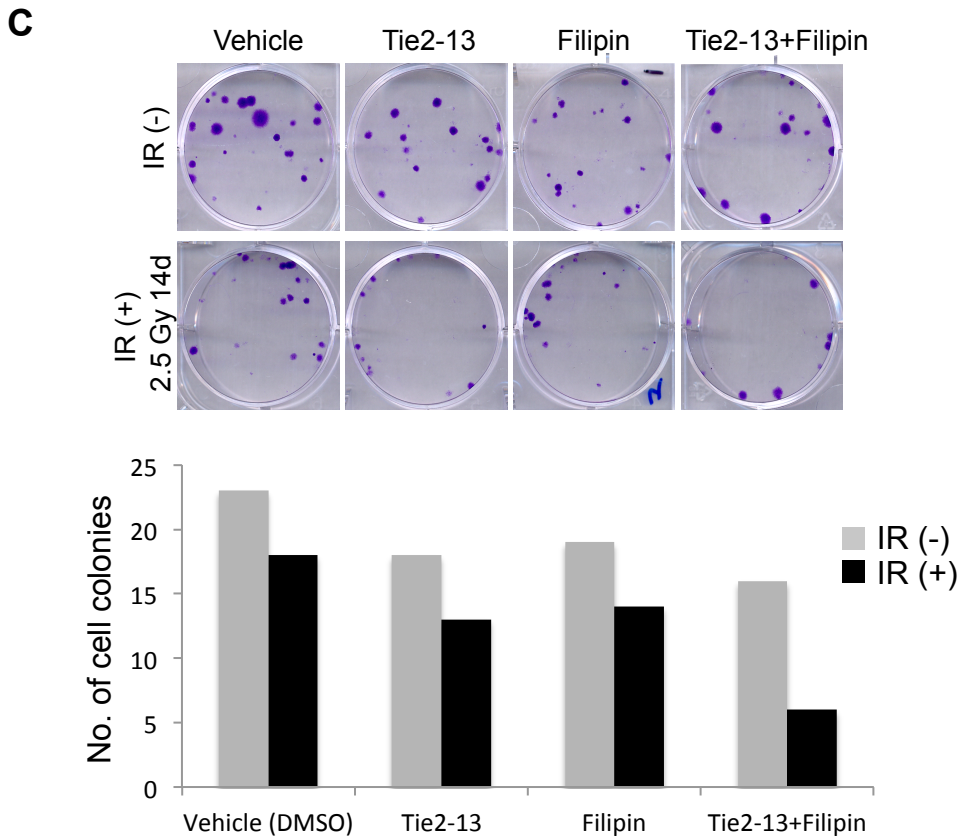

**Supplemental Fig. S4.** Additional data on the role of TIE2/caveolin-1 in radioresistance.

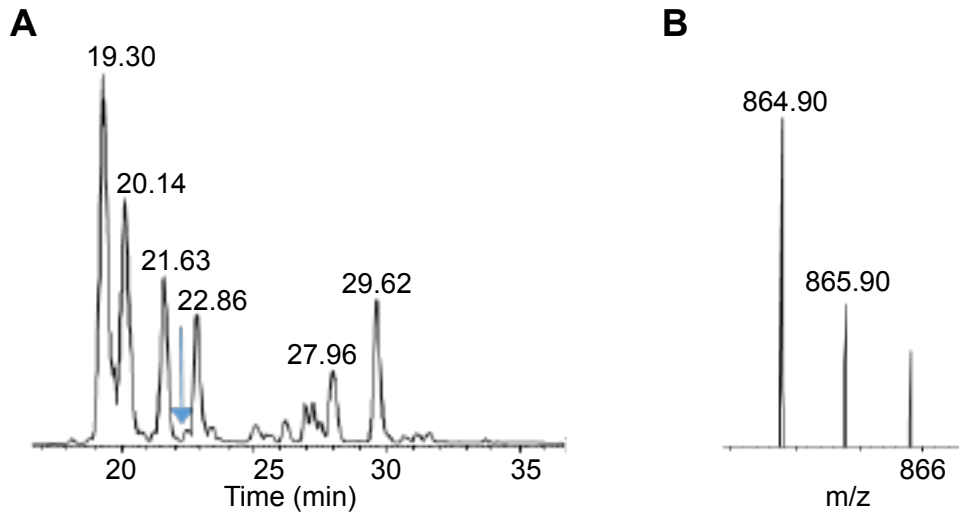

**C**

| Sequence              | phosphoRS Site Probabilities (%) |
|-----------------------|----------------------------------|
| ASFTTFTVTK            |                                  |
| YVDSEGHLYTVPIR        | Y(1): 0.0; Y(9): 100.0           |
| HLNDDVVK              |                                  |
| IDFEDVIAEPEGTHSFDGIWK |                                  |
| EQGNIIKPNnKAmADELSEK  | Y(6): 0.0                        |
| EIDLVNRDPK            |                                  |
| EIDLVnRDPK            |                                  |
| YWFYR                 | Y(1): 0.0; Y(4): 0.0             |
| EIDLVNR               |                                  |

**Supplemental Fig. S5.** Additional analyses of mass spectrometry of TIE2-mediated caveolin-1 phosphorylation.

**A**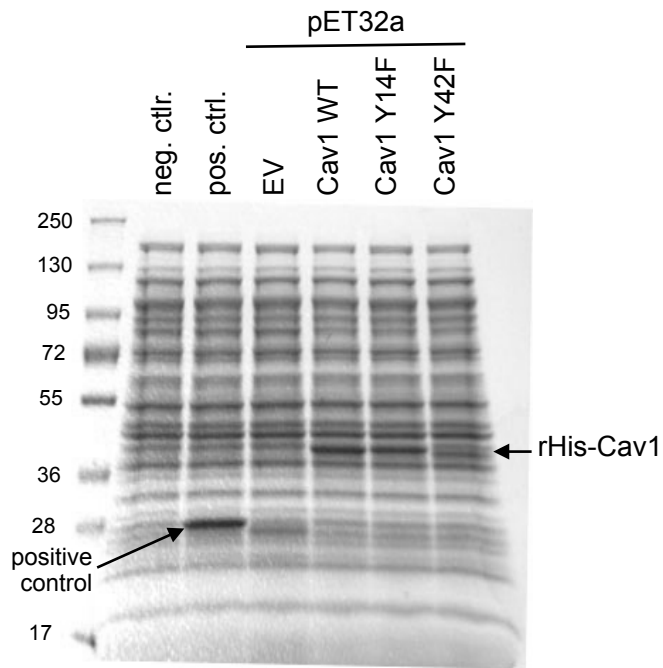**B**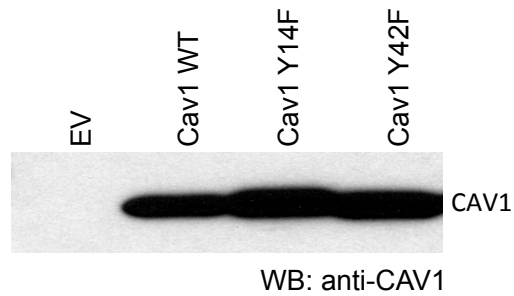

**Supplemental Fig. S6:** *In vitro* caveolin-1 expression, as assessed using a cell free protein expression system.

## SUPPLEMENTAL INFORMATION

### SUPPLEMENTAL FIGURE LEGENDS

**Supplemental Fig. S1.** Additional data on caveolin-1-dependent TIE2 nuclear translocation using confocal microscopy. (A) HEK293.Tie2-myc cultures were serum starved for 4 hours before IR (10Gy; 30 min). Cell fixation and immunofluorescence studies were performed as previously described (1), using anti-myc-tag antibody (red fluorescence). Green fluorescence from the GFP signal was used as a reporter for caveolin-1 expression. DAPI was used for nuclear staining. Merged images are provided for visualization of TIE2/caveolin-1 nuclear co-localization. (B) HEK293.Tie2-myc cultures were serum starved for 4 hours and treated with Filipin (1 $\mu$ g/ml); 60 min later, Ang1 was added (400 ng/ml; 30 min). Images were captured using a confocal microscope (Olympus FluoView FV1000).

**Supplemental Fig. S2.** Additional data on caveolin-1-dependent TIE2 nuclear translocation. (A) U251.Tie2 cultures were transfected with two different siRNAs against caveolin-1 (10 nM); 48 hours later, they were exposed to Ang1 for 30 min. BSA (0.1% in PBS) was used as the vehicle/control in Ang1(-) samples. siCon, non-targeted siRNA. Cytoplasmic and nuclear proteins were obtained after subcellular fractionation and analyzed by Western blot analysis. LaminB and tubulin expression levels were used as nuclear and cytoplasmic protein loading controls, respectively. (B) U251.Tie2 cells were transfected with two different siRNAs against Tie2 (10 nM) and exposed to Ang1; proteins were analyzed as described in (A). siCon, non-targeted siRNA. The siRNA sequences used are listed in Supplemental Table 1. The antibodies and working dilutions are listed in Supplemental Table 3.

**Supplemental Fig. S3.** Additional data on caveolin-1-dependent TIE2 nuclear translocation using confocal microscope. siRNA against caveolin-1 (A) or siRNA against Tie2 (B) was transfected into HEK293.Tie2-myc cells, and 24 hours later, Cav1-GFP plasmid was transfected, and after 36 hours cells were serum starved for additional 4 hours before treatment with Ang1(400 ng/ml; 30 min). Confocal microscopy was performed as Fig S1.

**Supplemental Fig. S4.** Additional analyses on the role of TIE2/caveolin-1 in radioresistance. (A) U251.Tie2 cells treated with the TIE2 inhibitor Tie2-13 (1 and 5  $\mu$ M; Enzo Life Sciences; ALX-270-434) (2) and exposed to Ang1 (400 ng/ml; 30 min). Nuclear and cytoplasmic proteins were obtained by subcellular fractionation and subjected to Western blot analysis. LaminB and tubulin were used for nuclear and cytoplasmic protein loading controls, respectively. (B) U251.Tie2 cells were plated in a 96-well plate at subconfluent density and treated with Tie2-13 (5  $\mu$ M) and Filipin (2  $\mu$ g/ml) (3), alone or in combination; 24 h later, they were irradiated (15 Gy) and kept in an incubator for an additional 48 h at 37°C. Cell viability was visualized with crystal violet solution (0.1% crystal violet and 20% methanol) for 15 min at room temperature (RT); a representative experiment is presented. (C) U251.Tie2 cells (25 cells) were plated in a 6-well plate and treated with Tie2-13 (5  $\mu$ M) and Filipin (1  $\mu$ g/ml), alone or in combination; 24 h later, they were irradiated (2.5 Gy) and kept in an incubator for 2 weeks at 37°C. Cells were stained with crystal violet solution (0.1% crystal violet and 20% methanol) for 15 min at room temperature (RT); a representative experiment is presented.

**Supplemental Fig. S5.** Additional analyses of mass spectrometry of TIE2-mediated caveolin-1 phosphorylation. As shown in Figure 4. Nano HPLC chromatographs of the



caveolin-1 protein tryptic peptide mixture; the target ion was eluted as indicated (arrow) in 22.86 min (A) and a zoom scan shows the target ion at 864.9Da (B). (C) Shown are the probabilities of phosphorylation of different Tyr residues of caveolin-1 after *in vitro* exposure to active TIE2, analyzed by mass spectrometry.

**Supplemental Fig. S6.** *In vitro* caveolin-1 expression, as assessed using a cell-free protein expression system. (A) We constructed *pET32a-Cav1WT* by cloning human caveolin-1 cDNA into the pET-32a(+) vector (Novagen, no. 69015-3) between the *Bam*HI and *Xho*I sites. *pET32a-Cav1Y14F* and *pET32a-Cav1Y42F* were generated using the QuikChange II site-directed mutagenesis kit (Agilent Technologies), following the manufacturer's recommended protocol. The primers used are listed in Supplementary Table 2. Colloidal blue staining (Invitrogen) of 4-20 Tris-Glicine gel showing *in vitro* wild-type (WT) and mutant (Y14F; Y42F) caveolin-1 protein expression using a cell-free protein expression system (AccuRapid cell-free protein expression kit, Bioneer, no. K7250) according to the manufacturer's protocol. No template was used in the negative control sample, and the manufacturer provided the positive control template. *EV*, pET-32a empty vector. (B) Western blot analysis of the *in vitro* cell-free system, which generated wild-type and mutant caveolin-1 proteins. The antibodies and working dilutions are listed in Supplemental Table 3.

**Supplemental Table 1. List of siRNA sequences used in this study**

| <b>Target protein</b> | <b>Company</b>          | <b>5' to 3' sequence</b>   |
|-----------------------|-------------------------|----------------------------|
| TIE2                  | Life Technology         | S: GCUUCUAUACAAACCCGUUTT   |
| (TIE2 #1)             | ID: s13984; no. 4390824 | As: AACGGGUUUGUAUAGAAGCTT  |
| TIE2                  | Life Technology         | S: CAAACCCGUUAAUCACUAUTT   |
| (TIE2 #2)             | ID: s13982; no. 4392420 | As: AUAGUGAUUAAACGGGUUUGTA |
| CAV1                  | Life Technology         | S: GCUUCCUGAUUGAGAUUCATT   |
| (CAV #1)              | ID: s2446; no. 4390824  | As: UGAAUCUCAAUCAGGAAGCTC  |
| CAV1                  | Life Technology         | S: CCUUCACUGUGACGAAAUATT   |
| (CAV #2)              | ID: s2448; no. 4457298  | As: UAUUUCGUCACAGUGAAGGTG  |

**Supplemental Table 2. List of primer sequences**

| <b>Primer name</b>  | <b>5' to 3' sequence</b>        |
|---------------------|---------------------------------|
| Cav1 Y14F sense     | GGATGGGAACGGTGAAGAGATGTCCCTCC   |
| Cav1Y14F antisense  | GGAGGGACATCTCTTCACCGTTCCCATCC   |
| Cav1Y14D Sense      | CGGAGGGACATCTCGACACCGTTCCCATC   |
| Cav1Y14D Antisense  | GATGGGAACGGTGTCTCGAGATGTCCCTCCG |
| Cav1 Y42F sense     | GTGCGCGTCGAACACTTGCTTCTCGCTCAG  |
| Cav1 Y42F antisense | CTGAGCGAGAAGCAAGTGTTTCGACGCGCAC |
| Tie2 F (for RT-PCR) | TTACGGGCCAGATTGTAAGC            |
| Tie2 R (for RT-PCR) | CATCCCCAAAGTAAGGCTCA            |
| Cav1 F (for RT-PCR) | GGGCAAATACGTAGACTCGGAGGGAC      |
| Cav1 R (for RT-PCR) | GCGAAGTAAATGCCCCAGATGAGTGC      |
| GAPDH sense         | ATGGGGAAGGTGAAGGTCGG            |
| GAPDH antisense     | GACGGTGCCATGGAATTTGC            |

**Supplemental Table 3. List of antibodies used in this study**

| <b>Antibody</b>                           | <b>Company</b>                                | <b>Experimental use</b>     |
|-------------------------------------------|-----------------------------------------------|-----------------------------|
| TIE2 (C-20)                               | Santa Cruz Biotechnology, Inc. (no. sc-324)   | WB (1:2000), IF (1:500), IP |
| CAV1                                      | Abcam (no. ab32577)                           | WB (1:2000)                 |
| CAV1 (N-20)                               | Santa Cruz Biotechnology, Inc. (no. sc-894)   | WB (1:2000)                 |
| CAV2 (H-96)                               | Santa Cruz Biotechnology, Inc. (no. sc-7942)  | WB (1:1000)                 |
| CAV3 (I-16)                               | Santa Cruz Biotechnology, Inc. (no. sc-5437)  | WB (1:1000)                 |
| pCAV1 (Y14)                               | Abcam (no. ab75876)                           | WB (1:2000)                 |
| <b>CD36</b>                               | <b>Abcam (no. ab133625)</b>                   | <b>WB (1:1000)</b>          |
| GFP                                       | Novus Biologicals (no. NB600-308)             | WB (1:5000)                 |
| LaminB                                    | Santa Cruz Biotechnology, Inc. (no. sc-6216)  | WB (1:4000)                 |
| Alpha-tubulin                             | Santa Cruz Biotechnology, Inc. (no. sc-23948) | WB (1:5000)                 |
| Myc-tag                                   | Cell Signaling Technology (no. 2276)          | WB (1:2000), IF (1:500), IP |
| $\gamma$ H2AX (mouse)                     | Abcam (no. ab26350)                           | WB (1:2000), IF (1:1000)    |
| PTRF                                      | Novus USA (no. H00284119-B01P)                | IB (1:500)                  |
| Alexa Fluor 555 goat anti-mouse IgG (H+L) | Life Technologies (no. A-21422)               | IF (1:1000)                 |

WB, Western blotting; IF, immunofluorescence; IP, immunoprecipitation.

## REFERENCES

1. **Hossain MB, Shifat R, Johnson DG, Bedford MT, Gabrusiewicz KR, Cortes-Santiago N, Luo X, Lu Z, Ezhilarasan R, Sulman EP, Jiang H, Li SS, Lang FF, Tyler J, Hung MC, Fueyo J, Gomez-Manzano C.** 2016. TIE2-mediated tyrosine phosphorylation of H4 regulates DNA damage response by recruiting ABL1. *Sci Adv* **2**:e1501290.
2. **Gourzoulidou E, Carpintero M, Baumhof P, Giannis A, Waldmann H.** 2005. Inhibition of angiogenesis-relevant receptor tyrosine kinases by sulindac analogues. *Chembiochem* **6**:527-531.
3. **Lu Z, Ghosh S, Wang Z, Hunter T.** 2003. Downregulation of caveolin-1 function by EGF leads to the loss of E-cadherin, increased transcriptional activity of beta-catenin, and enhanced tumor cell invasion. *Cancer Cell* **4**:499-515.
